# Supplementary material for: A versatile, automated and high-throughput drug screening platform for zebrafish embryos
Source: Oxford University Press journal article supplement (doi:10.1242/bio.058513), 2021-07-12
Supplement: bio058513supp.pdf [file bio058513supp.pdf]

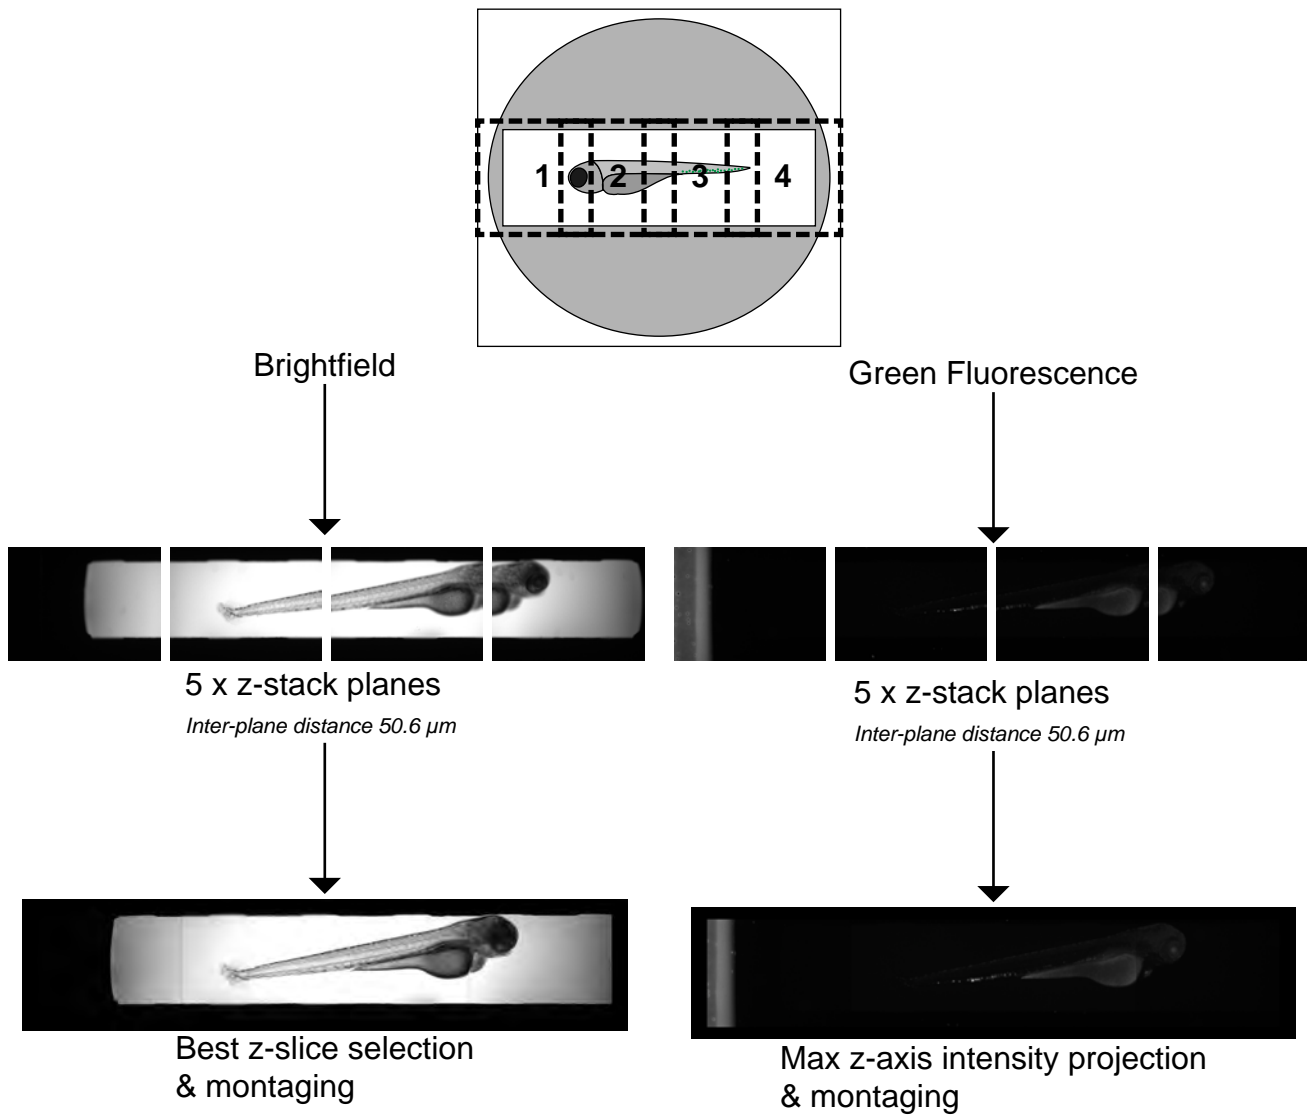

Fig. S1

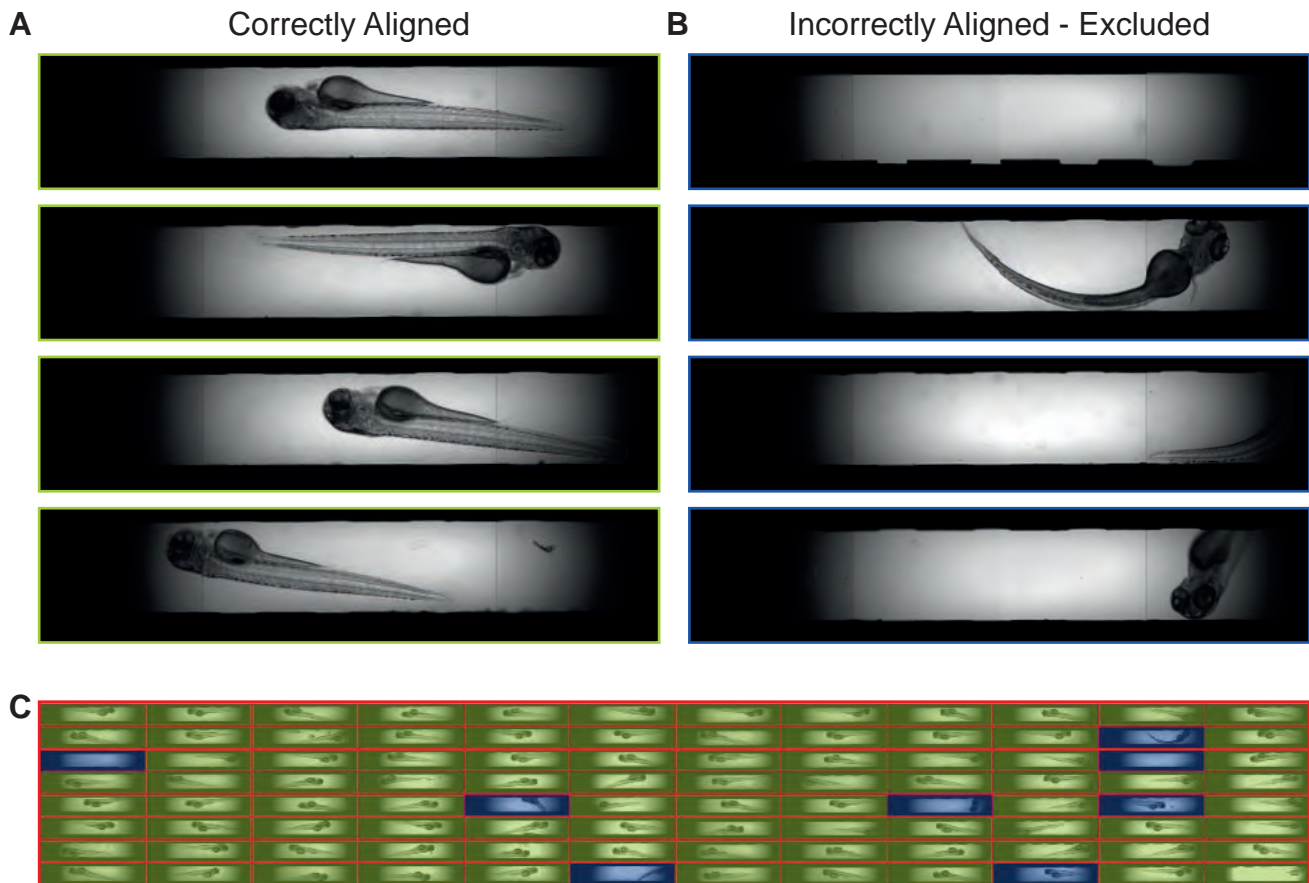

**Fig. S2.**
